# Supplementary material for: Assessing the performance of MM/PBSA and MM/GBSA methods. 10. Prediction reliability of binding affinities and binding poses for RNA–ligand complexes
Source: Royal Society of Chemistry journal article supplement (doi:10.1039/d3cp04366e), 2024-01-01
Supplement: d3cp04366e2.pdf [file d3cp04366e2.pdf]

**Table S1. The detailed information of Dataset I**

| <b>PDBID</b> | <b>Resolution</b> | <b>Ligand</b>                   | <b>Activity</b> | <b>Activity_Type</b> | <b>pK<sub>i</sub>/pK<sub>d</sub></b> |
|--------------|-------------------|---------------------------------|-----------------|----------------------|--------------------------------------|
| 1ARJ         | NMR               | ['ARG']                         | 1mM             | Kd                   | 3.00                                 |
| 1FYP         | NMR               | ['PAR']                         | 2.5uM           | Kd                   | 5.60                                 |
| 1Q8N         | NMR               | ['MGR']                         | 800nM           | Kd                   | 6.10                                 |
| 1UTS         | NMR               | ['P13']                         | 0.039uM         | Ki                   | 7.41                                 |
| 1UUD         | NMR               | ['P14']                         | 1.54uM          | Ki                   | 5.81                                 |
| 2AU4         | NMR               | ['GTP']                         | 75nM            | Kd                   | 7.12                                 |
| 2F4S         | 2.8               | ['XXX']                         | 19uM            | Kd                   | 4.72                                 |
| 2F4T         | 3                 | ['AB9']                         | 2.2uM           | Kd                   | 5.66                                 |
| 2F4U         | 2.6               | ['AB6']                         | 5.9uM           | Kd                   | 5.23                                 |
| 2KGP         | NMR               | ['MIX']                         | 1uM             | Kd                   | 6.00                                 |
| 2KTZ         | NMR               | ['ISH']                         | 9uM             | Kd                   | 5.05                                 |
| 2KU0         | NMR               | ['ISI']                         | 2.6uM           | Kd                   | 5.59                                 |
| 2KX8         | NMR               | ['ARG']                         | 6.31uM          | Kd                   | 5.20                                 |
| 2L94         | NMR               | ['L94']                         | 360uM           | Kd                   | 3.44                                 |
| 2LWK         | NMR               | ['0EC']                         | 50.5uM          | Kd                   | 4.30                                 |
| 2MXS         | NMR               | ['PAR']                         | 5.1uM           | Kd                   | 5.29                                 |
| 2N0J         | NMR               | ['RIO']                         | 0.33uM          | Kd                   | 6.48                                 |
| 4LVZ         | 1.77              | ['6AP']                         | 0.5uM           | Kd                   | 6.30                                 |
| 4LW0         | 1.89              | ['ADE']                         | 8uM             | Kd                   | 5.10                                 |
| 6HAG         | NMR               | ['SAH']                         | 3.7uM           | Kd                   | 5.43                                 |
| 1QD3         | NMR               | ['BDG', 'CYY',<br>'IDG', 'RIB'] | 5.9uM           | Kd                   | 5.23                                 |

|      |      |                          |        |    |      |
|------|------|--------------------------|--------|----|------|
| 1BYJ | NMR  | ['GE1', 'GE2',<br>'GE3'] | 2uM    | Kd | 5.70 |
| 3S4P | 2.56 | ['JS6']                  | 1.0uM  | Ki | 6.00 |
| 4LVW | 1.77 | ['7DG']                  | 66uM   | Kd | 4.18 |
| 4LVY | 2    | ['LYA']                  | 110uM  | Kd | 3.96 |
| 2O3W | 2.8  | ['PAR']                  | 2.6uM  | Kd | 5.59 |
| 2O3X | 2.9  | ['N30']                  | 50uM   | Kd | 4.30 |
| 3NPN | 2.79 | ['SAH']                  | 32nM   | Kd | 7.49 |
| 2BE0 | 2.63 | ['JS5']                  | 0.13uM | Kd | 6.89 |

**Table S2. The PDBIDs of Dataset II.**

---

PDBIDs of Dataset II

---

6VA2,4LVZ,2O3V,3NPN,2M4Q,6XB7,6GZR,1Q8N,2LWK,2AU4,2F4T,2MIY,2L94,4LW0,6VA3,2F4S,2KTZ,2KXM,7A3Y,1PBR,2ET8,1NEM,2MXS,  
1TOB,5VCF,5Z1I,7RWR,1EHT,2N0J,1KOC,1FMN,2O3X,1AKX,1AM0,1AJU,6JBF,2KX8,3Q50,5SWE,6U8F,1UUD,2OE8,2F4U,2KU0,2KGP,2L1V,1  
BYJ,6HAG,2TOB,7FJ0,5VCI,1KOD,1ARJ,1O15,1LVJ,6GZK

---

**Table S3. The correlation ( $R_p$ ) comparison of three water models including TIP3P, OPC and SPC based on the minimized structure in OL3 force field. The binding free energy was calculated using GB<sup>GBn2</sup> method.**

| Interior Dielectric | Force Field | GB <sup>GBn2</sup> (TIP3P) | GB <sup>GBn2</sup> (OPC) | GB <sup>GBn2</sup> (SPC) |
|---------------------|-------------|----------------------------|--------------------------|--------------------------|
| 1                   | OL3         | -0.383                     | -0.185                   | -0.136                   |
| 2                   |             | -0.418                     | -0.275                   | -0.233                   |
| 4                   |             | -0.438                     | -0.338                   | -0.307                   |
| 8                   |             | -0.440                     | -0.373                   | -0.350                   |
| 12                  |             | -0.437                     | -0.384                   | -0.365                   |
| 16                  |             | -0.434                     | -0.389                   | -0.372                   |
| 20                  |             | -0.432                     | -0.392                   | -0.377                   |

**Table S4. The RMSE (kcal/mol) between the experimentally determined binding free energy and the binding free energy predicted by MM/GBSA or MM/PBSA for the structures extracted from the 6 ns MD trajectories in explicit solvent model.**

| Interior Dielectric | Force Field | GB <sup>HC</sup> <sub>T</sub> | GB <sup>OBC</sup> <sub>1</sub> | GB <sup>OBC</sup> <sub>2</sub> | GB <sup>GBn</sup> <sub>1</sub> | GB <sup>GBn2</sup> | PBSA   | Interior Dielectric | Force Field | GB <sup>HC</sup> <sub>T</sub> | GB <sup>OBC</sup> <sub>1</sub> | GB <sup>OBC</sup> <sub>2</sub> | GB <sup>GBn</sup> <sub>1</sub> | GB <sup>GBn</sup> <sub>2</sub> | PBSA   |
|---------------------|-------------|-------------------------------|--------------------------------|--------------------------------|--------------------------------|--------------------|--------|---------------------|-------------|-------------------------------|--------------------------------|--------------------------------|--------------------------------|--------------------------------|--------|
| 1                   | ff99bsc0    | 35.968                        | 29.329                         | 31.545                         | 33.064                         | 149.909            | 27.805 | 1                   | ROC         | 35.428                        | 28.582                         | 30.756                         | 30.848                         | 32.245                         | 23.053 |
| 2                   |             | 26.872                        | 23.599                         | 24.593                         | 24.997                         | 71.166             | 21.022 | 2                   |             | 28.128                        | 24.865                         | 25.843                         | 25.599                         | 26.578                         | 19.953 |
| 4                   |             | 22.963                        | 21.418                         | 21.851                         | 21.916                         | 33.968             | 18.127 | 4                   |             | 24.964                        | 23.443                         | 23.881                         | 23.673                         | 24.231                         | 18.607 |
| 8                   |             | 21.275                        | 20.566                         | 20.755                         | 20.748                         | 19.918             | 16.553 | 8                   |             | 23.563                        | 22.866                         | 23.062                         | 22.941                         | 23.225                         | 17.643 |

|    |      |        |        |        |        |        |        |    |      |        |        |        |        |        |        |
|----|------|--------|--------|--------|--------|--------|--------|----|------|--------|--------|--------|--------|--------|--------|
| 12 |      | 20.763 | 20.323 | 20.438 | 20.425 | 17.942 | 15.859 | 12 |      | 23.129 | 22.695 | 22.816 | 22.735 | 22.918 | 17.134 |
| 16 |      | 20.518 | 20.209 | 20.289 | 20.277 | 17.826 | 15.419 | 16 |      | 22.918 | 22.614 | 22.698 | 22.640 | 22.770 | 16.793 |
| 20 |      | 20.374 | 20.144 | 20.203 | 20.193 | 18.054 | 15.106 | 20 |      | 22.794 | 22.567 | 22.630 | 22.585 | 22.683 | 16.543 |
| 1  |      | 32.405 | 26.409 | 28.554 | 28.904 | 31.753 | 22.835 | 1  |      | 33.253 | 26.570 | 28.777 | 29.885 | 35.609 | 22.088 |
| 2  |      | 26.119 | 23.231 | 24.182 | 23.866 | 25.379 | 19.388 | 2  |      | 26.499 | 23.208 | 24.208 | 24.368 | 27.170 | 18.907 |
| 4  |      | 23.511 | 22.160 | 22.579 | 22.278 | 23.021 | 18.188 | 4  |      | 23.582 | 22.015 | 22.464 | 22.416 | 23.726 | 17.876 |
| 8  | LJbb | 22.398 | 21.778 | 21.964 | 21.785 | 22.133 | 17.411 | 8  | Shaw | 22.294 | 21.566 | 21.768 | 21.712 | 22.309 | 17.130 |
| 12 |      | 22.061 | 21.675 | 21.789 | 21.669 | 21.887 | 16.975 | 12 |      | 21.894 | 21.441 | 21.565 | 21.522 | 21.892 | 16.671 |
| 16 |      | 21.899 | 21.628 | 21.708 | 21.620 | 21.773 | 16.663 | 16 |      | 21.701 | 21.382 | 21.469 | 21.436 | 21.695 | 16.334 |
| 20 |      | 21.804 | 21.602 | 21.661 | 21.594 | 21.709 | 16.422 | 20 |      | 21.587 | 21.349 | 21.413 | 21.388 | 21.581 | 16.070 |
| 1  |      | 37.861 | 30.932 | 33.202 | 33.146 | 51.677 | 25.894 | 1  |      | 34.279 | 28.463 | 30.894 | 32.599 | 37.722 | 24.146 |
| 2  |      | 29.268 | 25.856 | 26.910 | 26.279 | 34.359 | 21.393 | 2  |      | 25.992 | 23.140 | 24.244 | 24.675 | 27.157 | 19.425 |
| 4  |      | 25.562 | 23.944 | 24.422 | 23.924 | 27.229 | 19.572 | 4  |      | 22.373 | 21.025 | 21.515 | 21.570 | 22.715 | 17.454 |
| 8  | OL3  | 23.941 | 23.193 | 23.408 | 23.124 | 24.460 | 18.419 | 8  | YIL  | 20.777 | 20.157 | 20.374 | 20.355 | 20.869 | 16.283 |
| 12 |      | 23.443 | 22.977 | 23.110 | 22.920 | 23.704 | 17.827 | 12 |      | 20.286 | 19.900 | 20.033 | 20.011 | 20.327 | 15.718 |
| 16 |      | 23.202 | 22.876 | 22.968 | 22.831 | 23.363 | 17.425 | 16 |      | 20.048 | 19.778 | 19.870 | 19.851 | 20.071 | 15.347 |
| 20 |      | 23.061 | 22.817 | 22.886 | 22.781 | 23.170 | 17.120 | 20 |      | 19.909 | 19.707 | 19.775 | 19.760 | 19.923 | 15.070 |

**Table S5. The net charge ( $e^-$ ) for each RNA-ligand system.**

| PDBID | Charge ( $e^-$ ) |
|-------|------------------|
| 1ARJ  | -25              |
| 1FYP  | -21              |
| 1Q8N  | -36              |
| 1UTS  | -25              |
| 1UUD  | -25              |
| 2AU4  | -36              |
| 2F4S  | -36              |

|      |     |
|------|-----|
| 2F4T | -37 |
| 2F4U | -35 |
| 2KGP | -22 |
| 2KTZ | -34 |
| 2KU0 | -34 |
| 2KX8 | -39 |
| 2L94 | -40 |
| 2LWK | -30 |
| 2MXS | -21 |
| 2N0J | -22 |
| 4LVZ | -88 |
| 4LW0 | -88 |
| 6HAG | -40 |
| 1QD3 | -22 |
| 3S4P | -28 |
| 4LVW | -88 |
| 4LVY | -88 |
| 2O3W | -39 |
| 2O3X | -40 |
| 3NPN | -51 |
| 2BE0 | -30 |
| 1BYJ | -21 |

---
